# Supplementary material for: Environmental and spatial drivers of taxonomic, functional, and phylogenetic characteristics of bat communities in human-modified landscapes
Source: PeerJ journal article supplement (doi:10.7717/peerj.2551), 2016-10-13
Supplement: Supplemental_Table_S4.pdf [file Supplemental_Table_S4.pdf]

## Description of landscape metrics.

Table S4. Indices that quantified landscape structure at each of three focal scales for each of the 15 sampling sites based on a 2011 land cover map.

| Landscape index              | Formula                                                      | Variables                                                                                                                                                                                                                          | Description                                                                                                                                                                     |
|------------------------------|--------------------------------------------------------------|------------------------------------------------------------------------------------------------------------------------------------------------------------------------------------------------------------------------------------|---------------------------------------------------------------------------------------------------------------------------------------------------------------------------------|
| Composition                  |                                                              |                                                                                                                                                                                                                                    |                                                                                                                                                                                 |
| Percent forest/pasture       | $\frac{\sum_{j=1}^n a_{ij}}{A} (100)$                        | $a_{ij}$ , area (m <sup>2</sup> ) of patch $ij$ ; $A$ , total landscape area (m <sup>2</sup> ).                                                                                                                                    | Percent of the total area of the focal scale occupied by a particular land cover type (i.e. forest or pasture).                                                                 |
| Mean forest patch size       | $\frac{\sum_{j=1}^n a_{ij} (\frac{1}{10,000})}{n_i}$         | $a_{ij}$ , area (m <sup>2</sup> ) of patch $ij$ ; $n_i$ , number of patches of land cover type $i$ .                                                                                                                               | Average area of all forest patches (divided by 10,000 to convert to hectares) within a focal scale.                                                                             |
| Forest patch density         | $\frac{n_i}{A} (10,000) (100)$                               | $n_i$ , number of patches of land cover type $i$ ; $A$ , total landscape area (m <sup>2</sup> ).                                                                                                                                   | Number of forest patches divided by total area of the focal scale (multiplied 10,000 and 100 to convert to 100 hectares).                                                       |
| Simpson's diversity          | $1 - \sum_{i=1}^m P_i^2$                                     | $P_i$ , proportion of landscape occupied by land cover type $i$ .                                                                                                                                                                  | Measures landscape heterogeneity by considering proportions of all land cover types within a focal scale.                                                                       |
| Configuration                |                                                              |                                                                                                                                                                                                                                    |                                                                                                                                                                                 |
| Mean forest proximity        | $\frac{\sum_j \sum_{s=1}^n \frac{a_{ijs}}{h_{ijs}^2}}{n_i}$  | $a_{ijs}$ , area (m <sup>2</sup> ) of patches $ijs$ within focal scale; $h_{ijs}$ , distance (m) between patch $ijs$ and nearest neighbor patch $ijs$ , based on patch edge-to-edge distance; $n_i$ , number of patches type $i$ . | Average of the sum of forest patch area divided by the edge-to-edge distance squared between the focal patch and the nearest patch for all forest patches within a focal scale. |
| Mean forest nearest neighbor | $\frac{\sum_{j=1}^n h_{ij}}{n_i}$                            | $h_{ij}$ , distance (m) between patch $ij$ and nearest neighbor patch of type $i$ , based on patch edge-to-edge distance; $n_i$ , number of patches type $i$ .                                                                     | Average minimum edge-to-edge distance between all possible pairwise patches of forest in a focal scale.                                                                         |
| Mean forest patch shape      | $\frac{\sum_{j=1}^n \frac{0.25 p_{ij}}{\sqrt{a_{ij}}}}{n_i}$ | $p_{ij}$ , perimeter (m) of patch $ij$ ; $a_{ij}$ , area (m <sup>2</sup> ) of patch $ij$ ; $n_i$ , number of patches of land cover type $i$ .                                                                                      | Average of forest patch perimeter divided by square root of patch area, adjusted by a constant to adjust for a square standard, within a focal scale.                           |
| Forest edge density          | $\frac{\sum_{k=1}^m e_{ik}}{A} (10,000)$                     | $e_{ik}$ , total length (m) of edge of all patches type $i$ ; $A$ , total landscape area (m <sup>2</sup> ).                                                                                                                        | Total length of edge of forest patches divided by total area of the focal scale (multiplied by 10,000 to convert to hectares).                                                  |
