# Supplementary material for: Environmental and spatial drivers of taxonomic, functional, and phylogenetic characteristics of bat communities in human-modified landscapes
Source: PeerJ journal article supplement (doi:10.7717/peerj.2551), 2016-10-13
Supplement: Supplemental_Table_S5.pdf [file Supplemental_Table_S5.pdf]

Proportion of functional or phylogenetic variation due to composition or due to dispersion.

Table S5. Proportion of the total functional or phylogenetic variation (sum-of-squares) that was due to the composition component or the dispersion component for each of the eight functional approaches and for the phylogenetic approach.

|                                | <u>Composition</u> | <u>Dispersion</u> |
|--------------------------------|--------------------|-------------------|
| Dry season                     |                    |                   |
| Functional — all               | 0.10               | 0.90              |
| Functional — diet              | 0.03               | 0.97              |
| Functional — foraging location | 0.14               | 0.86              |
| Functional — foraging strategy | 0.15               | 0.85              |
| Functional — roost             | 0.03               | 0.97              |
| Functional — size              | 0.09               | 0.91              |
| Functional — skull             | 0.08               | 0.92              |
| Functional — wing              | 0.09               | 0.91              |
| Phylogenetic                   | 0.06               | 0.94              |
| Wet season                     |                    |                   |
| Functional — all               | 0.07               | 0.93              |
| Functional — diet              | 0.04               | 0.96              |
| Functional — foraging location | 0.07               | 0.93              |
| Functional — foraging strategy | 0.08               | 0.92              |
| Functional — roost             | 0.02               | 0.98              |
| Functional — size              | 0.08               | 0.92              |
| Functional — skull             | 0.08               | 0.92              |
| Functional — wing              | 0.07               | 0.93              |
| Phylogenetic                   | 0.04               | 0.96              |
