# Supplementary material for: Environmental and spatial drivers of taxonomic, functional, and phylogenetic characteristics of bat communities in human-modified landscapes
Source: PeerJ journal article supplement (doi:10.7717/peerj.2551), 2016-10-13
Supplement: Supplemental_Table_S6.pdf [file Supplemental_Table_S6.pdf]

Results from three weighted least-square regressions using environmental and spatial predictors for species composition, functional dispersion or phylogenetic dispersion.

Table S6. For each combination of season and scale, adjusted  $R^2$  of the model with both sets of predictor variables [abc], the model with environmental variables [ab], and the model with the spatial variable [bc] for (1) taxonomic structure based on species composition, (2) functional dispersion based on all attributes, and (3) phylogenetic dispersion. Negative values of adjusted  $R^2$  should be interpreted as zeros (Legendre 2008).

|                  | 1 km scale |      |      | 3 km scale |       |      | 5 km scale |      |      |
|------------------|------------|------|------|------------|-------|------|------------|------|------|
|                  | [abc]      | [ab] | [bc] | [abc]      | [ab]  | [bc] | [abc]      | [ab] | [bc] |
| Dry season       |            |      |      |            |       |      |            |      |      |
| Taxonomic        | 0.15       | 0.17 | 0.04 | 0.31       | 0.25  | 0.04 | 0.39       | 0.44 | 0.04 |
| Functional — all | 1.00       | 1.00 | 0.94 | 0.99       | 0.99  | 0.94 | 1.00       | 1.00 | 0.94 |
| Phylogenetic     | 1.00       | 0.99 | 0.97 | 0.98       | 0.98  | 0.97 | 0.99       | 0.99 | 0.97 |
| Wet season       |            |      |      |            |       |      |            |      |      |
| Taxonomic        | -0.02      | 0.03 | 0.07 | 0.15       | -0.02 | 0.07 | 0.13       | 0.17 | 0.07 |
| Functional — all | 0.98       | 0.98 | 0.95 | 0.99       | 0.99  | 0.95 | 0.99       | 0.99 | 0.95 |
| Phylogenetic     | 0.99       | 0.99 | 0.97 | 1.00       | 1.00  | 0.97 | 1.00       | 1.00 | 0.97 |
